# Supplementary material for: Controlling product selectivity in oxidative desulfurization using an electrodeposited iron oxide film
Source: Royal Society of Chemistry journal article supplement (doi:10.1039/d3dt01074k), 2023-01-01
Supplement: d3dt01074k1.pdf [file d3dt01074k1.pdf]

## Supplementary Information:

# Controlling product selectivity in oxidative desulfurization using an electrodeposited iron film.

*Victoria Kompanijec<sup>a</sup>, Gil M. Repa<sup>b</sup>, Lisa A. Fredin<sup>b</sup>, and John R. Swierk<sup>a\*</sup>.*

a. Department of Chemistry, State University of New York at Binghamton, Vestal, NY 13850

b. Department of Chemistry, Lehigh University, Bethlehem, PA 18015

\* E-mail: jswierk@binghamton.edu

\* E-mail: laf218@lehigh.edu

All computational structures can be found at <https://github.com/fredingroup/DBToxidation.git>

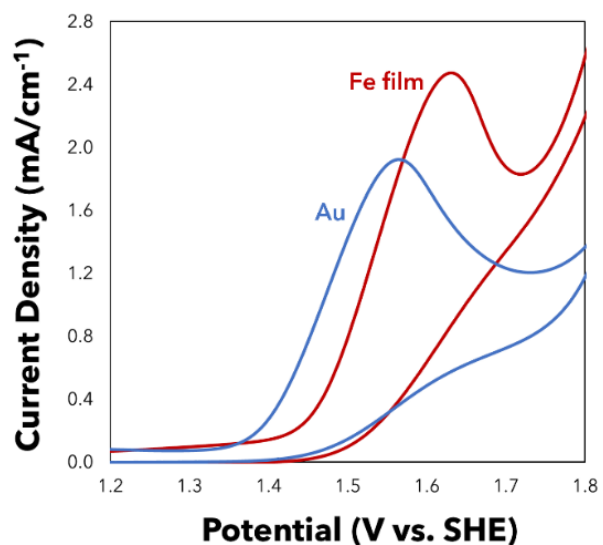

**Figure S1.** Comparison of cyclic voltammograms for DBT oxidation using a Au electrode and electrodeposited Fe film. 10 mM DBT in 0.1 M NH<sub>4</sub>PF<sub>6</sub> in ACN. Pseudo-Ag/Ag<sup>+</sup> reference electrode, coiled Pt wire counter, 20 mV/s scan rate.

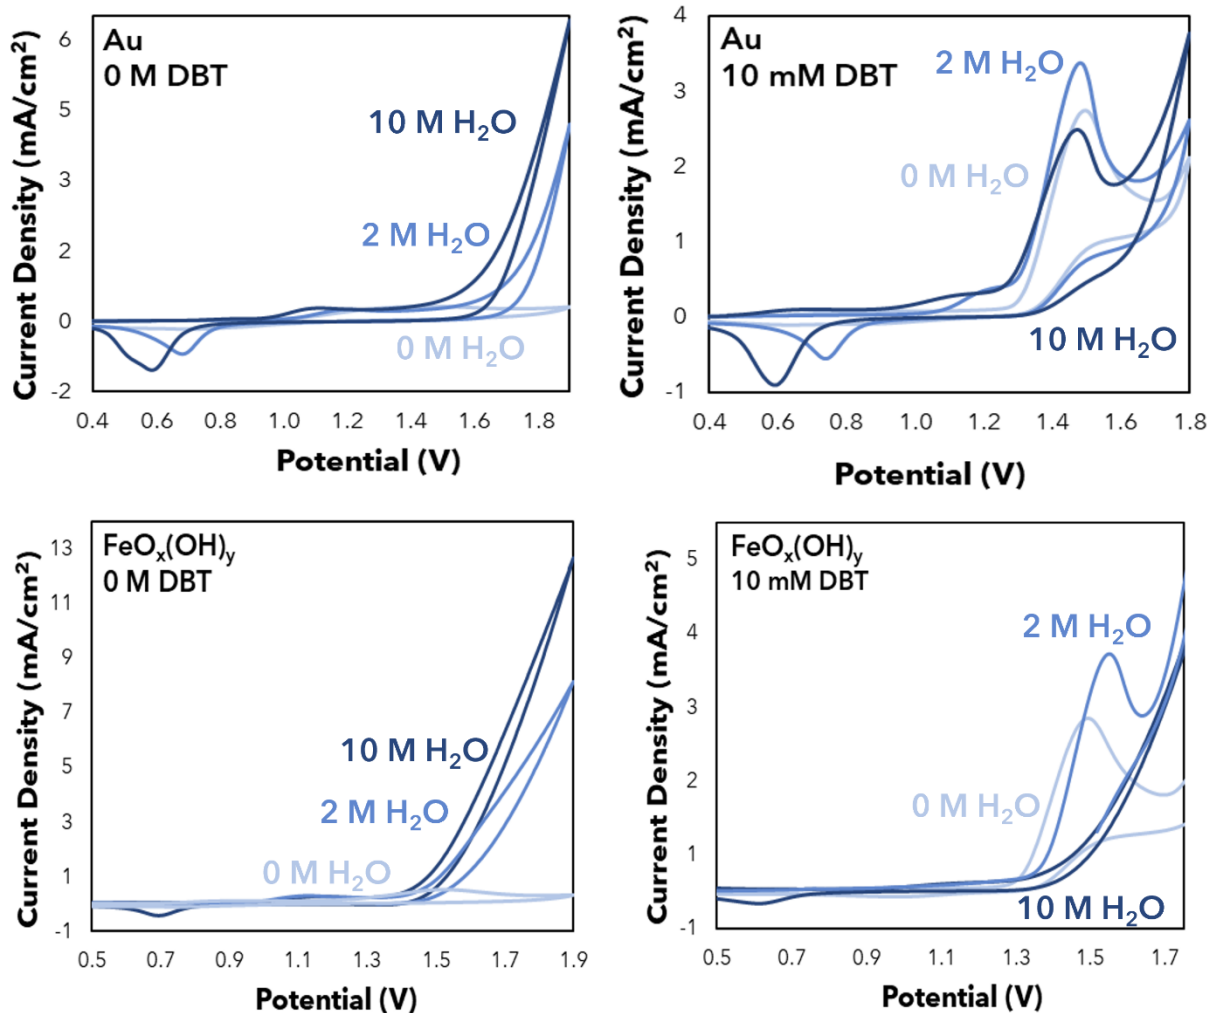

**Figure S2.** Cyclic voltammograms in 0, 2, and 10 M water electrolytic conditions in the absence and presence (10 mM) of DBT for Au (top) and FeO<sub>x</sub>(OH)<sub>y</sub> film (bottom). 0.1 M NH<sub>4</sub>PF<sub>6</sub> in ACN electrolyte, pseudo-Ag/Ag<sup>+</sup> reference electrode, coiled Pt wire counter, 20 mV/s scan rate.

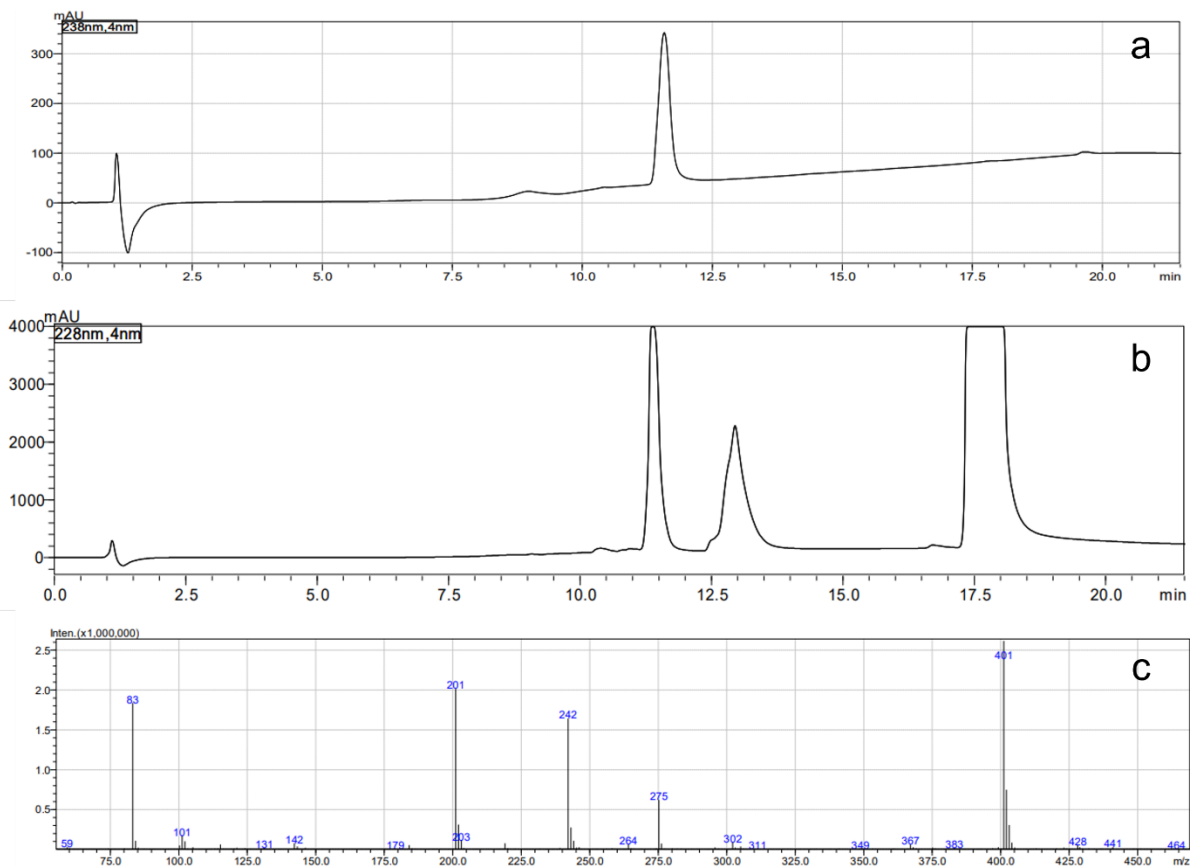

**Figure S3.** (a) Liquid chromatogram of standard DBTO compared to (b) a typical spectrum post-electrolysis, showing the presence of DBTO in the product, alongside DBT dimer (ret time ~13.0 min) and remaining DBT (ret time ~18.0 min). (c) Mass spectrum obtained at a retention time of 11.5 min from spectrum (b), showing a  $m/z$  peak at 201, which corresponds to DBTO. Reverse phase LCMS obtained using a water-acetonitrile gradient.

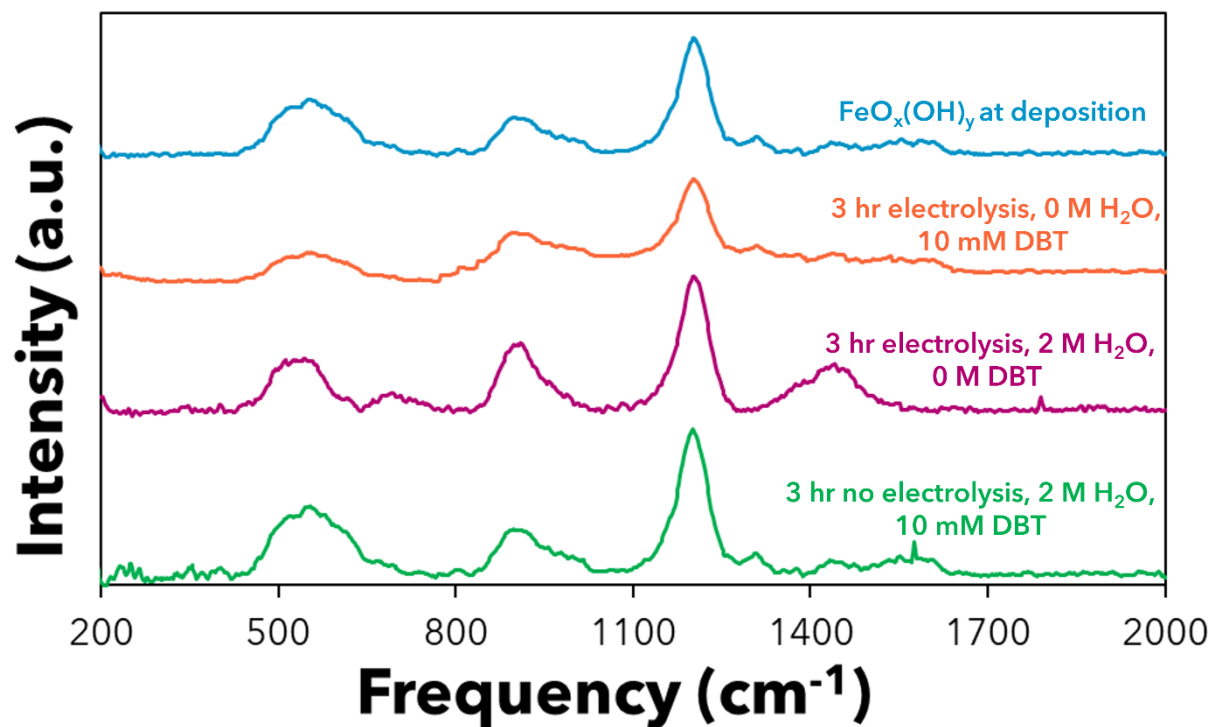

**Figure S4.** Raman spectra of the FeO<sub>x</sub>(OH)<sub>y</sub> film upon deposition and after three hours under different experimental conditions. Power: 221 mW, wavelength: 785 nm.

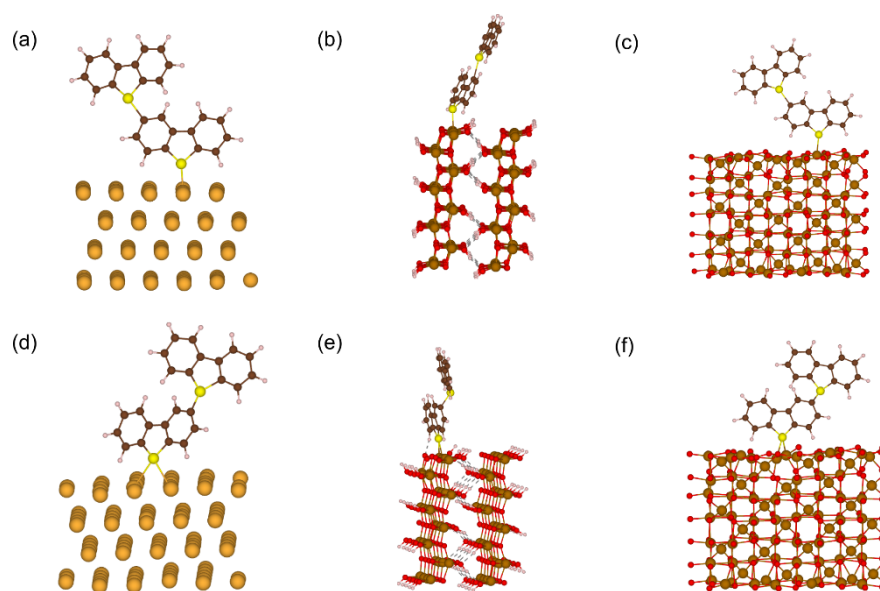

**Figure S5.** DBT-dimer optimized unit cells for monodentate and bidentate gold (111) (a & d), maghemite (001) (b&e), and lepidocrocite (010) (c&f).

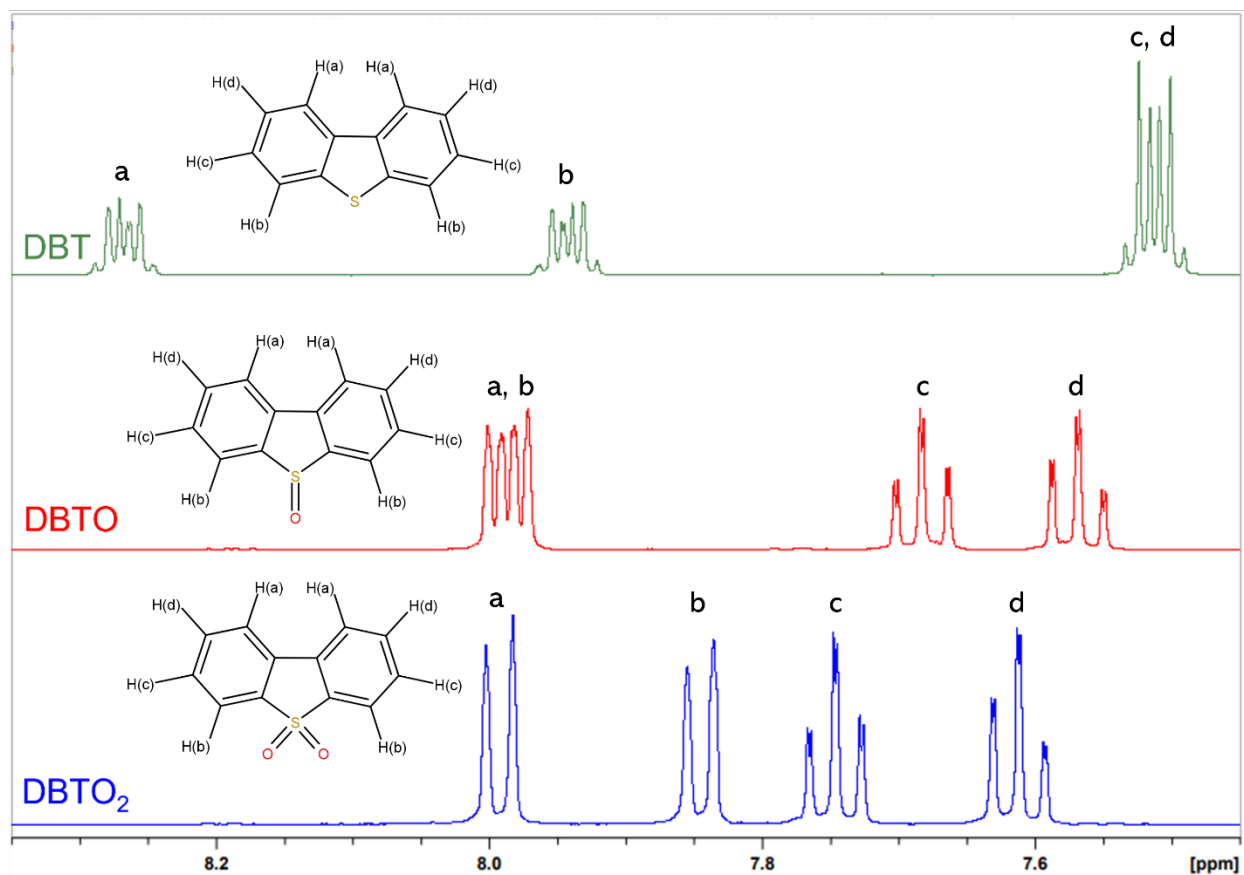

**Figure S6.** Standard NMR spectra for DBT and common oxidation products DBTO and DBTO<sub>2</sub>. Obtained using a 400 MHz NMR in CD<sub>3</sub>CN.

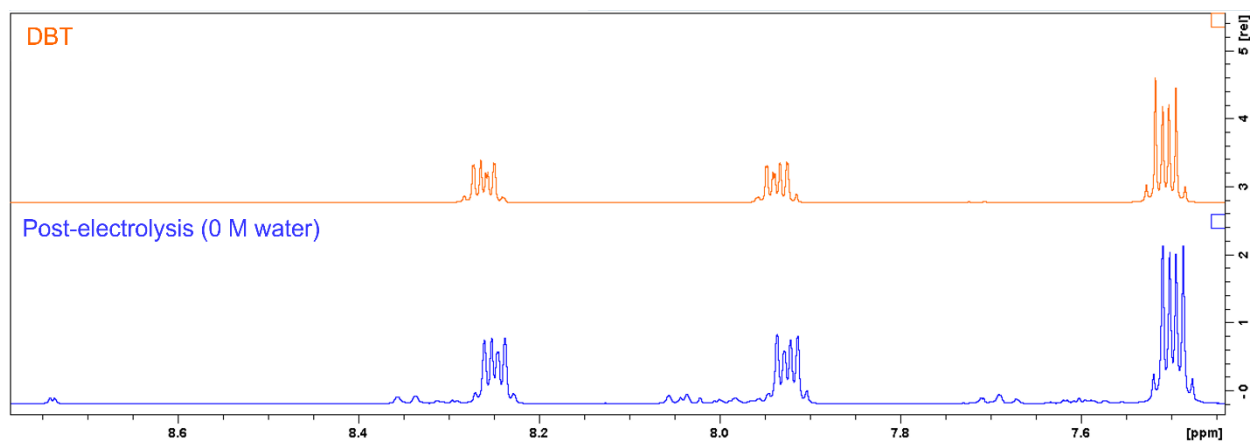

**Figure S7.** NMR spectrum displaying peak positions for DBT dimer (7.60, 7.69, 8.04, 8.35 and 8.74), the sole oxidation product in the absence of water. Obtained using a 400 MHz NMR in  $\text{CD}_3\text{CN}$ .

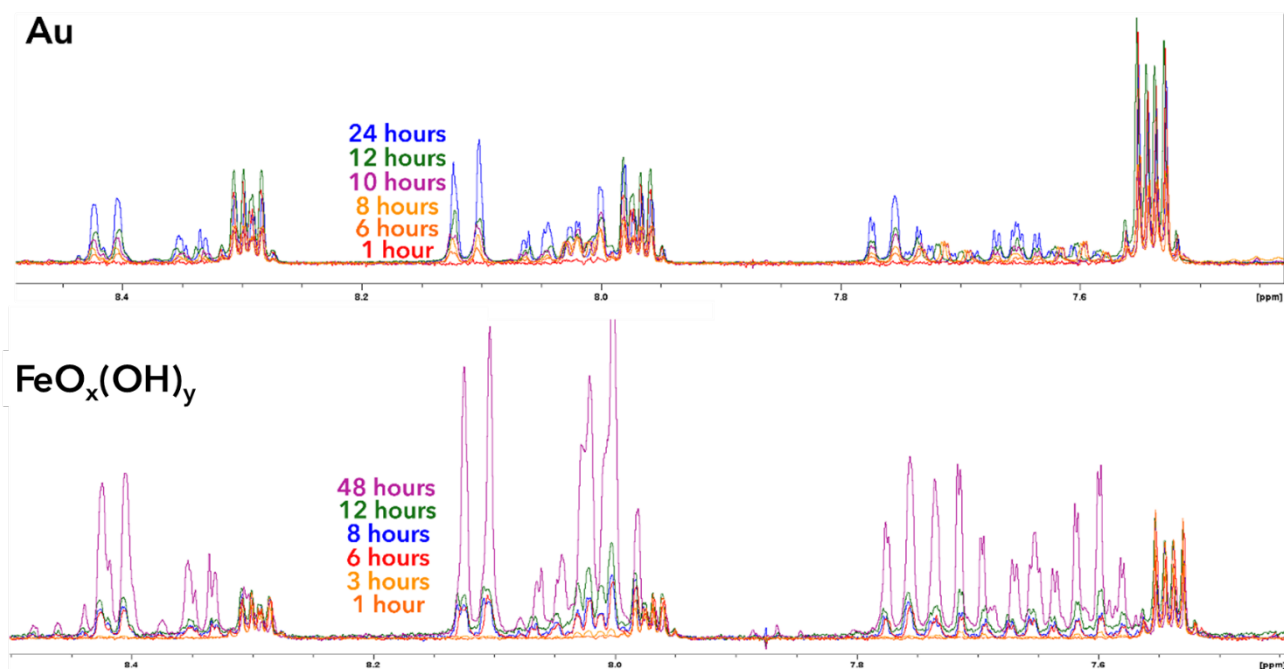

**Figure S8.** NMR spectra at various time points throughout electrolysis of DBT using Au (top) and  $\text{FeO}_x(\text{OH})_y$  film (bottom). Au yields more prominent dimer peaks, while the Fe film shows a mixture of dimer and DBTO.

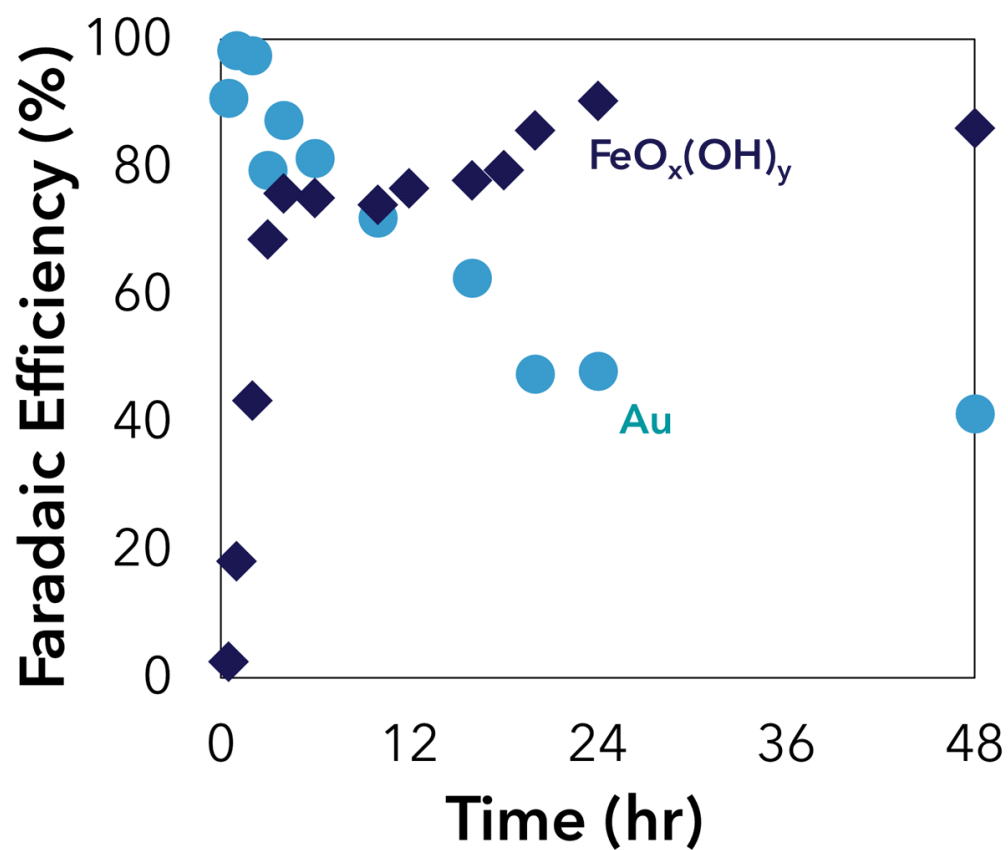

**Figure S9.** Faradaic efficiencies for DBTO and DBT dimer production at all times aliquots were collected, showing the degradation of Au's efficiency over time and the induction period for the Fe film.

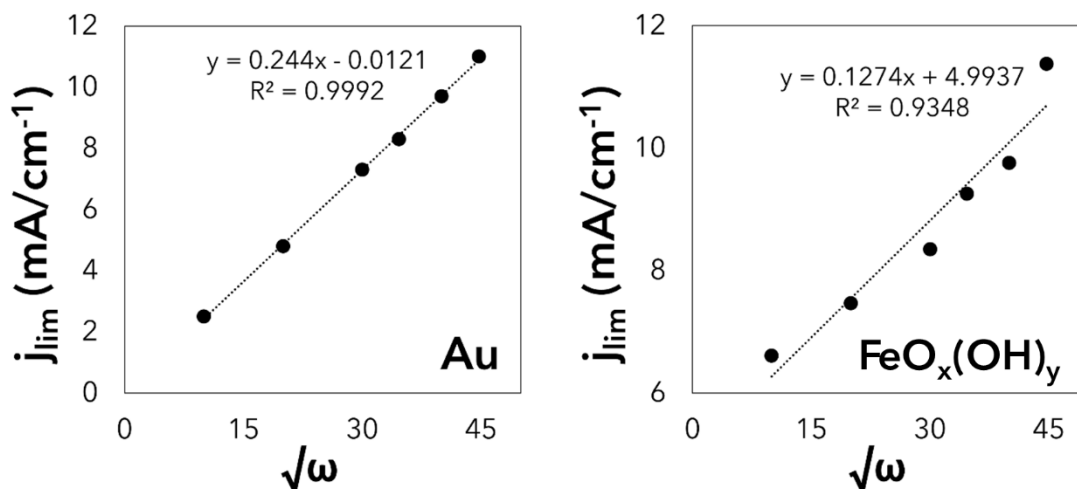

**Figure S10.** Limiting current density obtained from Linear Sweep Voltammograms at different rotational speeds for the Au and FeO<sub>x</sub>(OH)<sub>y</sub> film working electrodes.

**Table S1.** Resulting values from the limiting current density at different rotational rates, demonstrating the higher apparent concentration of DBT at the gold electrode compared to the Fe film.<sup>1</sup>

| Working Electrode | Slope of limiting current density vs rotation rate plot | Apparent concentration of DBT (mM) |
|-------------------|---------------------------------------------------------|------------------------------------|
| Au                | 0.244                                                   | 2.10                               |
| Fe film           | 0.127                                                   | 0.75                               |



**Table S2.** PBEsol energies (in eV) and Fe-S Bond lengths (in Å) for the different surfaces and adsorbates

|             | Surface                                | clean surface | DBT monomer | DBT-dimer | DBT+ surface | DBT-dimer +surface | DBT monomer +surface -1e <sup>-</sup> (oxidized) | Fe-S (DBT+surface) | Fe-S (DBT-dimer +surface) | Fe-S (DBT monomer +surface -1e <sup>-</sup> (oxidized)) |
|-------------|----------------------------------------|---------------|-------------|-----------|--------------|--------------------|--------------------------------------------------|--------------------|---------------------------|---------------------------------------------------------|
| Monodentate | Y-FeOOH (010)                          | -1724.53      | -145.56     | -284.19   | -1875.75     | -2009.54           | -1876.85                                         | 2.23               | 2.42                      | 2.23                                                    |
|             | Y-Fe <sub>2</sub> O <sub>3</sub> (001) | -1570.76      | -145.56     | -284.78   | -1718.06     | -1858.02           | -1719.60                                         | 2.48               | 2.54                      | 2.46                                                    |
|             | Gold (100)                             | -370.00       | -145.56     | -284.68   | -515.88      | -655.10            | -514.95                                          | 2.41               | 2.40                      | 2.40                                                    |
| Bidentate   | Y-FeOOH (010)                          | -1724.53      | -145.56     | -284.90   | -1869.26     | -1999.48           | -1869.95                                         | 2.57, 2.83         | 2.47, 2.62                | 2.57, 2.83                                              |
|             | Y-Fe <sub>2</sub> O <sub>3</sub> (001) | -1570.76      | -145.56     | -284.90   | -1716.24     | -1854.57           | -1716.56                                         | 2.48, 2.50         | 2.52, 2.73                | 2.51, 2.45                                              |
|             | Gold (100)                             | -370.00       | -145.56     | -284.90   | -515.96      | -655.17            | -516.01                                          | 2.86, 2.84         | 2.70, 2.82                | 2.63, 2.82                                              |

**Table S3.** PBEsol energies for DBT-dimer adsorption in different configurations

| <b>Surfaces</b>                                | <b>Monodentate (kJ/mol)</b> | <b>Bidentate (kJ/mol)</b> |
|------------------------------------------------|-----------------------------|---------------------------|
| $\gamma$ -FeOOH (010)                          | -79.72                      | 960.51                    |
| $\gamma$ -Fe <sub>2</sub> O <sub>3</sub> (001) | -246.08                     | 105.01                    |
| Au (111)                                       | -39.70                      | -25.47                    |

**Table S4.** Calculated Bader charges of DBT/DBT-dimer adsorbed on each surface, relative to the isolated molecule.

| Surfaces                               | Monodentate      |                        | Bidentate        |                        |
|----------------------------------------|------------------|------------------------|------------------|------------------------|
|                                        | Q <sub>DBT</sub> | Q <sub>DBT-dimer</sub> | Q <sub>DBT</sub> | Q <sub>DBT-dimer</sub> |
| Y-FeOOH (010)                          | +7.6             | +14.1                  | +7.6             | +14.2                  |
| Y-Fe <sub>2</sub> O <sub>3</sub> (001) | +4.8             | +11.5                  | +7.5             | +11.6                  |
| Au (111)                               | +7.8             | +12.6                  | +7.8             | +14.6                  |

#### References

1. C. Hamman, A. Hamnett, W. Vielstich. *Electrochemistry*, Electrical Potentials and Electrical Current, pp. 193-194, Wiley-VCH, 2007.
